# Supplementary material for: Extent of Tumor Resection and Survival in Pediatric Patients With High-Grade Gliomas: A Systematic Review and Meta-analysis
Source: PubMed Central journal article supplement (PMC9382445; doi:10.1001/jamanetworkopen.2022.26551), 2022-08-16
Supplement: jamanetwopen-e2226551-s001.pdf [file jamanetwopen-e2226551-s001.pdf]

## Supplemental Online Content

Hatoum R, Chen JS, Lavergne P, et al. Extent of tumor resection and survival in pediatric patients with high-grade gliomas: a systematic review and meta-analysis. *JAMA Netw Open*. 2022;5(8):e2226551. doi:10.1001/jamanetworkopen.2022.26551

**eMethods.** Complete Search Strategy

**eTable 1.** Characteristics of Included Studies

**eTable 2.** Newcastle-Ottawa Scale and Cochrane Collaboration's Risk of Bias Tool Evaluation of Articles Included in Meta-analysis

**eTable 3.** Sensitivity Analysis of Meta-analysis Results After Removing Subgroups of Studies With Potential Bias

**eFigure 1.** PRISMA Flow Diagram

**eFigure 2.** Forest Plot of Relative Risk for 1-Year and 2-Year Mortality for Subtotal Resection Versus Biopsy

**eFigure 3.** Forest Plot of Relative Risk for 6-Month and 1-Year Progression for Gross Total Resection Versus Subtotal Resection

**eFigure 4.** Forest Plot of Relative Risk for 6-Month and 1-Year Progression for Subtotal Resection Versus Biopsy

**eFigure 5.** Funnel Plots for Forest Plots of Relative Risk for 1-Year and 2-Year Mortality Between Gross Total Resection Versus Subtotal Resection and Subtotal Resection Versus Biopsy

**eFigure 6.** Kaplan-Meier Curve Comparing Overall Survival According to Tumor Location and Adjuvant Treatment Regimen

**eFigure 7.** Kaplan-Meier Curve Comparing Overall Survival According to EOR in Tumor Location Subgroups

This supplemental material has been provided by the authors to give readers additional information about their work.

**eMethods. Complete Search Strategy**  
(#1 AND #2 AND #3) NOT #4

**#1:** Glioma[Mesh:noexp] OR Oligodendroglioma[mh] OR Ganglioglioma[mh] OR Astrocytoma[Mesh] OR Glioblastoma[tiab] OR glioblastomas[tiab] OR glyoblastoma[tiab] OR glyoblastomas[tiab] OR astroglioma[tiab] OR astrogliomas[tiab] OR astroglyoma[tiab] OR astroglyomas[tiab] OR Astrocytoma[tiab] OR Astrocytomas[tiab] OR oligoastrocytoma[tiab] OR oligoastrocytomas[tiab] OR "glia tumor"[tiab] OR "glia tumors"[tiab] OR "glia tumour"[tiab] OR "glia tumours"[tiab] OR "Glial Cell Tumor"[tiab] OR "Glial Cell Tumors"[tiab] OR "Glial Cell Tumour"[tiab] OR "Glial Cell Tumours"[tiab] OR "glya tumor"[tiab] OR "glya tumors"[tiab] OR "glya tumour"[tiab] OR "glya tumours"[tiab] OR "Glyal Cell Tumor"[tiab] OR "Glyal Cell Tumors"[tiab] OR "Glyal Cell Tumour"[tiab] OR "Glyal Cell Tumours"[tiab] OR Oligodendroglioma[tiab] OR Oligodendrogliomas[tiab] OR glioma[tiab] OR Glyoma[tiab] OR gliomas[tiab] OR Glyomas[tiab] OR Ganglioglioma[tiab] OR Ganglioglioma[tiab] OR Gangliogliomas[tiab] OR Gangliogliomas[tiab] OR Glioblastoma[OT] OR glioblastomas[OT] OR glyoblastoma[OT] OR glyoblastomas[OT] OR astroglioma[OT] OR astrogliomas[OT] OR astroglyoma[OT] OR astroglyomas[OT] OR Astrocytoma[OT] OR Astrocytomas[OT] OR oligoastrocytoma[OT] OR oligoastrocytomas[OT] OR "glia tumor"[OT] OR "glia tumors"[OT] OR "glia tumour"[OT] OR "glia tumours"[OT] OR "Glial Cell Tumor"[OT] OR "Glial Cell Tumors"[OT] OR "Glial Cell Tumour"[OT] OR "Glial Cell Tumours"[OT] OR "glya tumor"[OT] OR "glya tumors"[OT] OR "glya tumour"[OT] OR "glya tumours"[OT] OR "Glyal Cell Tumor"[OT] OR "Glyal Cell Tumors"[OT] OR "Glyal Cell Tumour"[OT] OR "Glyal Cell Tumours"[OT] OR Oligodendroglioma[OT] OR Oligodendrogliomas[OT] OR glioma[OT] OR Glyoma[OT] OR gliomas[OT] OR Glyomas[OT] OR Ganglioglioma[OT] OR Ganglioglioma[OT] OR Gangliogliomas[OT] OR Gangliogliomas[OT]

**#2:** Surgery[sh] OR Surgical Oncology[mh] OR General Surgery[mh] OR Neurosurgical Procedures[mh] OR Neoplasm, Residual[mh] OR Resection\*[tiab] OR Surger\*[tiab] OR Surgical\*[tiab] OR Neurosurger\*[tiab] OR Neurosurgical\*[tiab] OR Radiosurg\*[tiab] OR Craniotom\*[tiab] OR Craniectom\*[tiab] OR Ablation[tiab] OR Remove[tiab] OR Removing[tiab] OR Removal[tiab] OR operation[tiab] OR operative[tiab] OR stereotaxy[tiab] OR Stereotactic[tiab] OR Stereotaxic[tiab] OR residual[tiab] OR Resection\*[OT] OR Surger\*[OT] OR Surgical\*[OT] OR Neurosurger\*[OT] OR Neurosurgical\*[OT] OR Radiosurg\*[OT] OR Craniotom\*[OT] OR Craniectom\*[OT] OR Ablation[OT] OR Remove[OT] OR Removing[OT] OR Removal[OT] OR operation[OT] OR operative[OT] OR stereotaxy[OT] OR Stereotactic[OT] OR Stereotaxic[OT] OR residual[OT]

**#3:** Infant[MH] OR Child[MH] OR Adolescent[MH] OR Intensive Care, Neonatal[MH] OR Intensive Care Units, Neonatal[MH] OR Intensive Care Units, Pediatric[MH] OR Hospitals, Pediatric[MH] OR Neonatology[MH] OR Pediatrics[MH] OR Pediatricians[MH] OR Child, Hospitalized[MH] OR Adolescent, Hospitalized[MH] OR newborn\*[TIAB] OR new born\*[TIAB] OR babies\*[TIAB] OR baby\*[TIAB] OR infant\*[TIAB] OR infancy[TIAB] OR toddler\*[TIAB] OR preschool\*[TIAB] OR pre school\*[TIAB] OR child[TIAB] OR child'[TIAB] OR childs[TIAB] OR child's[TIAB] OR children\*[TIAB] OR childhood\*[TIAB] OR kid[TIAB] OR kid'[TIAB] OR kids[TIAB] OR kid's[TIAB] OR boy[TIAB] OR boy'[TIAB] OR boys[TIAB] OR boy's[TIAB] OR girl[TIAB] OR girl'[TIAB] OR girls[TIAB] OR girl's[TIAB] OR schoolchild\*[TIAB] OR juvenil\*[TIAB] OR preadolescen\*[TIAB] OR youth\*[TIAB] OR adolescen\*[TIAB] OR teen[TIAB] OR teen'[TIAB] OR teens[TIAB] OR teen's[TIAB] OR teenage\*[TIAB] OR puber[TIAB] OR puber'[TIAB] OR pubers[TIAB] OR puber's[TIAB] OR pubert\*[TIAB] OR pubescen\*[TIAB] OR high school\*[TIAB] OR highschool\*[TIAB] OR secondary school\*[TIAB] OR paediatric\*[TIAB] OR pediatric\*[TIAB] OR PICU\*[TIAB] OR neonat\*[TIAB] OR neo nat\*[TIAB] OR NICU\*[TIAB] OR newborn\*[OT] OR new born\*[OT] OR babies\*[OT] OR baby\*[OT] OR infant\*[OT] OR infancy[OT] OR toddler\*[OT] OR preschool\*[OT] OR pre school\*[OT] OR child[OT] OR child'[OT] OR childs[OT] OR child's[OT] OR children\*[OT] OR childhood\*[OT] OR kid[OT] OR kid'[OT] OR kids[OT] OR kid's[OT] OR boy[OT] OR boy'[OT] OR boys[OT] OR boy's[OT] OR girl[OT]

OR girl'[OT] OR girls[OT] OR girl's[OT] OR schoolchild\*[OT] OR juvenil\*[OT] OR preadolescenc\*[OT]  
OR youth\*[OT] OR adolescen\*[OT] OR teen[OT] OR teen'[OT] OR teens[OT] OR teen's[OT] OR  
teenage\*[OT] OR puber[OT] OR puber'[OT] OR pubers[OT] OR puber's[OT] OR pubert\*[OT] OR  
pubescen\*[OT] OR high school\*[OT] OR highschool\*[OT] OR secondary school\*[OT] OR  
paediatric\*[OT] OR pediatric\*[OT] OR PICU\*[OT] OR neonat\*[OT] OR neo nat\*[OT] OR NICU\*[OT]

**#4:** Animals[mh] NOT humans[mh]) OR mice[TIAB] OR mices[TIAB] OR mice's[TIAB] OR  
mices'[TIAB] OR mouse[TIAB] OR mouses[TIAB] OR mouse's[TIAB] OR mouses'[TIAB] OR rat[TIAB]  
OR rats[TIAB] OR rat's[TIAB] OR rats'[TIAB] OR mice[OT] OR mices[OT] OR mice's[OT] OR  
mices'[OT] OR mouse[OT] OR mouses[OT] OR mouse's[OT] OR mouses'[OT] OR rat[OT] OR rats[OT]  
OR rat's[OT] OR rats'[OT]

**eTable 1.** Characteristics of Included Studies

| Authors and Year            | Study Design                     | Country              | Sample Size | Age                | Follow-Up          | Extent of Resection Determination                        | Extent of Resection Definition                                                                                | Location                                                                | Pathology Review                                                       | Histology                                               | Adjuvant therapy                                                     |
|-----------------------------|----------------------------------|----------------------|-------------|--------------------|--------------------|----------------------------------------------------------|---------------------------------------------------------------------------------------------------------------|-------------------------------------------------------------------------|------------------------------------------------------------------------|---------------------------------------------------------|----------------------------------------------------------------------|
| Adams et al. 2016 [19]      | Retrospective study              | USA, UK, Netherlands | 336         | Mean: 10 years     | NS                 | Medical records                                          | No Surgery (NS), Biopsy (Bx), Partial Resection (PR), Gross Total Resection (GTR), & Surgery Unspecified (SU) | Midline & hemispheric (supratentorial and infratentorial)               | NS                                                                     | Grade IV (100%)                                         | RT (28.6%)<br>CT data not available                                  |
| Ansari et al. 2012 [30]     | Retrospective study              | Iran                 | 23          | Median: 16 years   | NS                 | Imaging reports                                          | Complete resection (CR), Partial resection (PR), & needle biopsy (NB)                                         | Only hemispheric                                                        | NS                                                                     | Grade IV (100%)                                         | RT (100%)<br>CT (43%)                                                |
| Bristot et al. 1998 [31]    | Retrospective study              | Italy                | 4           | Median: 11.5 years | Median: 8.3 months | Post-operative imaging                                   | GTR & STR                                                                                                     | Cerebellum                                                              | Pathologist diagnostic                                                 | Grade III (75%)<br>Grade IV (25%)                       | RT (50%)<br>CT (0%)                                                  |
| Broniscer et al. 2006 [32]  | Non-randomized clinical trial    | USA                  | 31          | Median: 12.3 years | Median: 15 months  | NS                                                       | GTR/NTR, STR/PR, & Bx                                                                                         | Hemispheric (42%), thalamic (45%), spinal (9.5%) & posterior fossa (3%) | NS                                                                     | Grade II (6%)<br>Grade III (44%)<br>Grade IV (48%)      | RT (87%)<br>CT (74% TMZ and 64% CPT-11 with TMZ)                     |
| Broniscer et al. 2009 [33]  | Prospective phase 1 study        | USA                  | 23          | Median: 10.7 years | NS                 | NS                                                       | GTR, NTR, STR, PR, & Bx                                                                                       | Hemispheric & midline (thalamus, cerebellum)                            | Central histologic review of all cases conducted by neuropathologist   | Grade III (47%)<br>Grade IV (53%)                       | Local RT<br>CT (Erlotinib administered once daily for up to 3 years) |
| Chastagner et al. 2007 [34] | Prospective non-randomized study | France               | 53          | Median: 12.1 years | Median: 10.5 years | Pre- and post-operative CT/MRI and neurosurgeon's report | GTR (>90%), PR (25-90%), & Bx (<25%)                                                                          | Hemispheric & midline (posterior fossa, spinal)                         | Central pathology review conducted by panel of four neuropathologists  | Grade III (30%)<br>Grade IV (38%)<br>Grade III-IV (32%) | RT (100%)<br>CT (BCNU for non-GTR, BCV for GTR)                      |
| Di Ruscio et al. 2022 [35]  | Retrospective study              | Italy                | 11          | Median: 20 months  | Median: 24 months  | Post-operative MRI                                       | GTR & STR                                                                                                     | Hemispheric & midline                                                   | Central histologic review conducted by two neuropathologists           | Grade III (64%)<br>Grade IV (36%)                       | RT (18%)<br>CT (100%)                                                |
| Donson et al. 2007 [36]     | Retrospective study              | USA                  | 10          | Median: 9.9 years  | Median: 4.5 months | NS                                                       | GTR, STR & Bx                                                                                                 | Hemispheric & midline (1 spinal cord tumor)                             | GBM cell lines established from tumors specimens obtained from surgery | Grade IV (100%)                                         | CT (70% temozolomide)                                                |
| Dorfer et al. 2021 [37]     | Retrospective study              | Austria              | 20          | Median: 9.5 years  | Median: 1.2 years  | Post-operative MRI                                       | STR & Bx                                                                                                      | Only thalamic                                                           | Central pathology review conducted by neuropathologist                 | Grade III (65%)<br>Grade IV (35%)                       | RT (100%)<br>CT (95%)                                                |

|                            |                                  |             |    |                    |                    |                                                                    |                                                                  |                                                                   |                                                                               |                                                          |                                                                                                                                                                                  |
|----------------------------|----------------------------------|-------------|----|--------------------|--------------------|--------------------------------------------------------------------|------------------------------------------------------------------|-------------------------------------------------------------------|-------------------------------------------------------------------------------|----------------------------------------------------------|----------------------------------------------------------------------------------------------------------------------------------------------------------------------------------|
| Dufour et al. 2006 [38]    | Prospective study                | France      | 21 | Median: 23 months  | Median: 5.2 years  | Early imaging-documented extent of resection                       | GTR (absence of residual tumor), STR (>90%), PR (<90%), & Bx     | Hemispheric & midline (and posterior fossa)                       | Centrally reviewed by panel of neuropathologists, WHO grading                 | Grade III (62%)<br>Grade IV (38%)                        | RT (0%)<br>CT (100%)                                                                                                                                                             |
| Eisenstat et al. 2014 [39] | Retrospective study              | USA, Canada | 60 | Mean: 7.61 years   | NS                 | Surgical reports (centrally reviewed)                              | GTR/NTR (>90% resection), STR (50-90%), PR (10-50%), & Bx (<10%) | Midline (basal ganglia, hypothalamus, thalamus, brainstem, other) | Central pathology review conducted by panel of five neuropathologist          | Grade III & IV                                           | RT (100%)<br>CT (either eight cycles of CCNU, vincristine and prednisone or vincristine, hydroxyurea, procarbazine, cisplatin, cytaraboside, dacarbazine and methylprednisolone) |
| Fernandez et al. 2006 [40] | Retrospective study              | France      | 14 | Median: 8 years    | Median: 12 months  | Surgical reports and post-operative imaging                        | GTR, PR, & Bx                                                    | Only thalamic                                                     | Centrally reviewed, WHO grading                                               | Grade II (43%)<br>Grade III (43%)<br>Grade IV (14%)      | RT (42%)<br>CT (57%),                                                                                                                                                            |
| Geyer et al. 1995 [41]     | Prospective non-randomized trial | USA         | 32 | Mean: 10 months    | NS                 | Post-operative CT scan and operating neurosurgeon's classification | Total resection (>90%), STR (59-90%), PR (<50%) & Bx             | Hemispheric & midline (spinal and posterior fossa)                | Centrally reviewed                                                            | Grade III & IV                                           | RT (7%)<br>CT (100%)                                                                                                                                                             |
| Grovas et al. 1999 [42]    | Prospective phase II study       | USA         | 11 | Median: 12 years   | NS                 | NS                                                                 | Complete resection (>90%), STR (51-90%)                          | NS                                                                | Histologic diagnosis was confirmed by rapid review process before study entry | Grade IV (100%)                                          | Delayed RT (100%)<br>The pre-ASCR preparative regimen included BCNU; thiotepa and etoposide.                                                                                     |
| Heideman et al. 1993 [43]  | Non-randomized prospective study | USA         | 13 | Median: 10 years   | Median: 14 months  | NS                                                                 | NTR (>90%), STR (50-90%), & Bx                                   | NS                                                                | NS                                                                            | Grade III (38%)<br>Grade IV (62%)                        | RT (84%)<br>CT (100% thiotepa, cyclophosphamide and autologous bone marrow infiltration)                                                                                         |
| Jakacki et al. 1999 [44]   | Non-randomized prospective study | USA         | 12 | Median: 7.5 years  | Median: 8.5 months | NS                                                                 | GTR, STR, PR, & Bx                                               | Hemispheric & midline (1 spinal cord)                             | NS                                                                            | Grade III (17%)<br>Grade IV (33%)<br>Non-specified (50%) | RT (100%)<br>CT (100% PCV)                                                                                                                                                       |
| Jakacki et al. 2008 [45]   | Non-randomized prospective study | USA         | 32 | Median: 12.5 years | Median: 15 months  | NS                                                                 | GTR, NTR, STR, PR, & Bx                                          | Hemispheric & midline                                             | Central pathology review                                                      | Grade III (34%)<br>Grade IV (50%)                        | RT (88%)<br>CT (88% temozolomide & lomustine)                                                                                                                                    |

|                           |                                 |                                                    |    |                    |                   |                                                                                                            |                                                                                    |                                                                          |                                            |                                   |                                                                                                                                                                                     |
|---------------------------|---------------------------------|----------------------------------------------------|----|--------------------|-------------------|------------------------------------------------------------------------------------------------------------|------------------------------------------------------------------------------------|--------------------------------------------------------------------------|--------------------------------------------|-----------------------------------|-------------------------------------------------------------------------------------------------------------------------------------------------------------------------------------|
| Jiao et al. 2021 [46]     | Retrospective study             | China                                              | 38 | Median: 11.5 years | Mean: 13 months   | NS                                                                                                         | GTR & STR                                                                          | Hemispheric & midline                                                    | NS                                         | Grade IV (100%)                   | RT (2.6%)<br>CT (13.2%)<br>RT + CT (47.4%)                                                                                                                                          |
| Jung et al. 2015 [47]     | Retrospective multicenter study | South Korea                                        | 62 | Median: 12 years   | NS                | Post-operative CT or MRI scan                                                                              | GTR (no residual tumor), STR (<50% residual tumor), PR (>50% residual tumor), & Bx | Hemispheric & midline                                                    | Grading according to WHO classification    | Grade III (45%)<br>Grade IV (55%) | RT 16.1%<br>CT (1.6%)<br>RT + CT (53.3%)                                                                                                                                            |
| Kramm et al. 2006 [48]    | Retrospective study             | USA, Canada, Germany, Suisse, Austria, and Belgium | 85 | Median: 11 years   | Median: 12 months | Neurosurgeon's reports and post-operative MRI                                                              | GTR (100% macroscopic tumor resection), STR (90%-100%), PR (<90%), & Bx            | Hemispheric (cortical) & midline (cerebellar and other)                  | Central pathology review                   | Grade III (40%)<br>Grade IV (60%) | RT (94%)<br>CT (94%)                                                                                                                                                                |
| Kulkarni et al. 1999 [49] | Retrospective study             | USA                                                | 4  | Median: 5.4 years  | Mean: 13 months   | NS                                                                                                         | GTR & STR                                                                          | Cerebellum                                                               | NS                                         | Grade IV (100%)                   | RT (50%)<br>CT(50%)                                                                                                                                                                 |
| Mahvash et al. 2011 [50]  | Retrospective study             | Germany                                            | 13 | Mean: 10.4 years   | NS                | Cranial CT scan (1991-2002) within 24 hours after surgery or MRI (2002-2005) within 72 hours after surgery | GTR & STR                                                                          | Hemispheric & midline (cerebellum, brainstem)                            | Diagnosis was verified by neuropathologist | Grade IV (100%)                   | RT (85%)<br>CT (70%)                                                                                                                                                                |
| Masoudi et al. 2008 [51]  | Retrospective study             | USA                                                | 66 | Median: 12.5 years | Median: 1 year    | NS                                                                                                         | GTR, STR, PR, & Bx                                                                 | NS                                                                       | NS                                         | Grade III (39%)<br>Grade IV (61%) | RT + CT                                                                                                                                                                             |
| McCrea et al. 2015 [16]   | Retrospective study             | USA                                                | 97 | Median: 11 years   | Mean: 2.3 years   | Postoperative imaging (magnetic resonance imaging [MRI]) report or from the clinical record.               | GTR, STR, & Bx                                                                     | Hemispheric (supratentorial) & midline (cerebellum, thalamus, brainstem) | Pathologist diagnostic                     | Grade III & IV                    | Excluding 13 patients with unknown adjuvant therapy: 92% of patients in our study were treated with radiation, 93% with chemotherapy, and 88% with both chemotherapy and radiation. |

|                             |                                          |             |    |                    |                    |                                                            |                                                      |                                                        |                                                                                |                                       |                                                                                                                                                                                     |
|-----------------------------|------------------------------------------|-------------|----|--------------------|--------------------|------------------------------------------------------------|------------------------------------------------------|--------------------------------------------------------|--------------------------------------------------------------------------------|---------------------------------------|-------------------------------------------------------------------------------------------------------------------------------------------------------------------------------------|
| Nikitovic et al. 2015 [18]  | Retrospective study                      | Serbia      | 15 | Mean: 11.8 years   | NS                 | Surgeon's operative report and postoperative CT/MRI images | GTR & STR                                            | Hemispheric & midline (infratentorial, supratentorial) | Neuropathologist reviewed all slides and confirmed histopathological diagnosis | Grade IV (100%)                       | RT (100%)<br>CT (60%)                                                                                                                                                               |
| Papadakis et al. 1999 [52]  | Non-randomized prospective study         | USA         | 42 | Median: 12.2 years | Median: 11 months  | Imaging reports                                            | Radical resection, less than radical resection, & Bx | Hemispheric & midline (2 spinal cord tumors)           | NS                                                                             | Grade III (30%)<br>Grade IV (70%)     | RT (50% post bone marrow rescue)<br>CT (100% thiotepa, BCNU & VP-16 prior to bone marrow rescue)                                                                                    |
| Parekh et al. 2010 [53]     | Retrospective study                      | USA         | 8  | Median: 13.5 years | Median: 33 weeks   | NS                                                         | GTR, NTR, STR, & PR                                  | Hemispheric & midline (thalamus, spine, brainstem)     | NS                                                                             | Grade III (75%)<br>Grade IV (12%)     | Six patients had received radiotherapy and all patients had received chemotherapy prior to the recurrence / progression for which a bevacizumab containing regimen was administered |
| Perkins et al. 2011 [54]    | Retrospective study                      | USA         | 24 | Median: 11 years   | Median: 13 months  | Qualitatively by surgeon and MRI when possible             | GTR, STR, & Bx                                       | Hemispheric & midline (infratentorial, supratentorial) | NS                                                                             | Grade IV (100%)                       | RT (100%)<br>CT (58%)                                                                                                                                                               |
| Phuphanich et al. 1984 [55] | Retrospective study                      | USA         | 27 | Median: 12.1 years | Median: 2.5 years  | NS                                                         | STR & Bx                                             | Hemispheric & midline                                  | Histological diagnosis confirmed at surgery                                    | Grade III & IV                        | RT (100%)<br>CT (44%)                                                                                                                                                               |
| Reddy et al. 2012 [56]      | Retrospective study                      | USA         | 5  | Median: 5 years    | Mean: 16 months    | Surgery report                                             | GTR & STR                                            | Cerebellum                                             | Histological diagnosis                                                         | Grade IV (100%)                       | RT (80%)<br>CT (60%),                                                                                                                                                               |
| Rodriguez et al. 2022 [57]  | Post-hoc analysis of a prospective trial | Multicenter | 43 | Median: 12.1 years | Median: 1 year     | Post-operative MRI                                         | Total, major debulking, minor debulking, & Bx        | Only thalamic                                          | Central histology review by one neuropathologist                               | Grade III (37.2%)<br>Grade IV (62.8%) | RT (100%)<br>CT (100%)                                                                                                                                                              |
| Sanders et al. 2007 [58]    | Retrospective study                      | USA         | 16 | Median: 1.1 years  | Median: 11.6 years | NS                                                         | GTR, NTR, STR, & Bx                                  | Hemispheric & midline                                  | Pathology reviewed by two independent pathologists                             | Grade III (56%)<br>Grade IV (31%)     | RT (80%)<br>CT (100%)                                                                                                                                                               |
| Shinoda et al. 1989 [59]    | Retrospective study                      | Japan       | 5  | Mean: 11 years     | NS                 | NS                                                         | STR (70-90%) & Bx                                    | Cerebellum                                             | NS                                                                             | Grade III (40%)<br>Grade IV (60%)     | RT (80%)<br>CT (80% bleomycin, adriamycin, ACNU, vincristine),                                                                                                                      |

|                              |                             |          |    |                    |                   |                                                                                                         |                              |                                                                          |                                                   |                                   |                                                          |
|------------------------------|-----------------------------|----------|----|--------------------|-------------------|---------------------------------------------------------------------------------------------------------|------------------------------|--------------------------------------------------------------------------|---------------------------------------------------|-----------------------------------|----------------------------------------------------------|
| Sirachainan et al. 2017 [60] | Prospective cohort study    | Thailand | 16 | Mean: 8.2 years    | Median: 1 year    | NS                                                                                                      | GTR, NTR, PR, & Bx           | Hemispheric & midline                                                    | NS                                                | Grade III (37%)<br>Grade IV (63%) | RT (100%)<br>CT (100%,<br>Nimotuzumab and<br>irinotecan) |
| Sposto et al. 1989 [61]      | Randomized controlled trial | USA      | 58 | NS                 | NS                | CT scans were not universally available, Surgical checklists and surgical notes were reviewed centrally | Complete resection, PR, & Bx | Hemispheric & midline (posterior fossa, basal ganglia)                   | Central pathology review performed on all patient | Grade III (46%)<br>Grade IV (54%) | RT + CT (48%)<br>RT alone (51%)                          |
| Wu et al. 2016 [62]          | Retrospective study         | Taiwan   | 20 | Median: 9.2 years  | Median: 5.3 years | Operative records of the surgeons and neuroimaging data 3 days after operation                          | GTR, STR, & Bx               | Hemispheric & midline (spine, suprasellar, intraventricular)             | Pathologist diagnostic                            | Grade II (45%)<br>Grade III (55%) | RT (35%)<br>CT (5%)                                      |
| Yang et al. 2013 [15]        | Retrospective study         | USA      | 37 | Median: 10.8 years | NS                | MRI when available, otherwise surgeon estimations or CT                                                 | GTR (100%), STR (<99%), & Bx | Hemispheric & midline (defined as cortical and deep). Excluded brainstem | NS                                                | Grade IV (100%)                   | RT only (5.4%)<br>CT only (2.7%)<br>RT + CT (89.2%)      |



**eTable 2.** Newcastle-Ottawa Scale and Cochrane Collaboration’s Risk of Bias Tool Evaluation of Articles Included in Meta-analysis

| Author & Year.               | Newcastle-Ottawa Scale                  |                                 |                                       |                                                                          |                                                                 |                       |                                            |                       | Total |
|------------------------------|-----------------------------------------|---------------------------------|---------------------------------------|--------------------------------------------------------------------------|-----------------------------------------------------------------|-----------------------|--------------------------------------------|-----------------------|-------|
|                              | Selection                               |                                 |                                       |                                                                          | Comparability                                                   | Outcome               |                                            |                       |       |
|                              | Representativeness of exposed cohort    | Selection of non-exposed cohort | Ascertainment of exposure             | Demonstration that outcome of interest was not present at start of study | Comparability of cohorts on the basis of the design or analysis | Assessment of outcome | Follow-up long enough for outcome to occur | Adequacy of follow-up |       |
| Adams et al. 2016 [19]       |                                         | *                               | *                                     |                                                                          | **                                                              | *                     | *                                          | *                     | 7     |
| Ansari et al. 2012 [30]      | *                                       | *                               | *                                     |                                                                          | *                                                               | *                     | *                                          | *                     | 6     |
| Bristot et al. 1998 [31]     |                                         | *                               | *                                     |                                                                          |                                                                 | *                     |                                            | *                     | 4     |
| Broniscer et al. 2006 [32]   |                                         | *                               |                                       |                                                                          |                                                                 | *                     | *                                          | *                     | 4     |
| Broniscer et al. 2009 [33]   |                                         | *                               |                                       |                                                                          |                                                                 | *                     |                                            |                       | 2     |
| Chastagner et al. 2006 [34]  | *                                       | *                               | *                                     |                                                                          |                                                                 | *                     | *                                          |                       | 5     |
| Di Ruscio et al. 2022 [35]   |                                         | *                               | *                                     |                                                                          | *                                                               | *                     | *                                          |                       | 5     |
| Donson et al. 2007 [36]      | *                                       | *                               |                                       |                                                                          | *                                                               | *                     | *                                          | *                     | 6     |
| Dorfer et al. 2021 [37]      |                                         | *                               | *                                     |                                                                          | *                                                               | *                     | *                                          |                       | 5     |
| Dufour et al. 2006 [38]      |                                         | *                               | *                                     |                                                                          |                                                                 | *                     | *                                          | *                     | 5     |
| Eisenstat et al. 2014 [39]   |                                         | *                               | *                                     |                                                                          |                                                                 | *                     | *                                          |                       | 4     |
| Fernandez et al. 2006 [40]   |                                         | *                               | *                                     |                                                                          |                                                                 | *                     | *                                          | *                     | 5     |
| Geyer et al. 1995 [41]       |                                         | *                               | *                                     |                                                                          |                                                                 | *                     | *                                          |                       | 4     |
| Grovas et al. 1999 [42]      |                                         | *                               |                                       |                                                                          |                                                                 | *                     | *                                          |                       | 3     |
| Heideman et al. 1993 [43]    |                                         | *                               |                                       |                                                                          |                                                                 | *                     | *                                          |                       | 3     |
| Jakacki et al. 1999 [44]     |                                         | *                               |                                       |                                                                          |                                                                 | *                     | *                                          | *                     | 4     |
| Jakacki et al. 2008 [45]     |                                         | *                               |                                       |                                                                          |                                                                 | *                     | *                                          | *                     | 4     |
| Jiao et al. 2021 [46]        | *                                       | *                               |                                       |                                                                          | *                                                               | *                     | *                                          |                       | 5     |
| Jung et al. 2015 [47]        | *                                       | *                               | *                                     |                                                                          | **                                                              | *                     | *                                          |                       | 7     |
| Kramm et al. 2006 [48]       | *                                       | *                               | *                                     |                                                                          | **                                                              | *                     | *                                          |                       | 7     |
| Kulkarni et al. 1999 [49]    | *                                       | *                               |                                       |                                                                          |                                                                 | *                     | *                                          |                       | 4     |
| Mahvash et al. 2011 [50]     | *                                       | *                               | *                                     |                                                                          |                                                                 | *                     | *                                          |                       | 5     |
| Masoudi et al. 2008 [51]     | *                                       | *                               |                                       |                                                                          |                                                                 | *                     | *                                          |                       | 4     |
| McCrea et al. 2015 [16]      | *                                       | *                               | *                                     |                                                                          | *                                                               | *                     | *                                          |                       | 6     |
| Nikitovic et al. 2015 [18]   | *                                       | *                               | *                                     |                                                                          |                                                                 | *                     | *                                          | *                     | 6     |
| Papadakis et al. 1999 [52]   |                                         | *                               | *                                     |                                                                          |                                                                 | *                     | *                                          | *                     | 5     |
| Parekh et al. 2010 [53]      |                                         | *                               |                                       |                                                                          |                                                                 | *                     |                                            |                       | 2     |
| Perkins et al. 2011 [54]     | *                                       | *                               | *                                     |                                                                          |                                                                 | *                     | *                                          | *                     | 6     |
| Phuphanich et al. 1984 [55]  | *                                       | *                               |                                       |                                                                          | *                                                               | *                     | *                                          |                       | 5     |
| Reddy et al. 2012 [56]       |                                         | *                               | *                                     |                                                                          |                                                                 | *                     | *                                          |                       | 4     |
| Rodriguez et al. 2022 [57]   |                                         | *                               | *                                     |                                                                          | *                                                               | *                     | *                                          | *                     | 6     |
| Sanders et al. 2007 [58]     | *                                       | *                               |                                       |                                                                          | *                                                               | *                     | *                                          | *                     | 6     |
| Shinoda et al. 1989 [59]     |                                         | *                               |                                       |                                                                          |                                                                 | *                     | *                                          | *                     | 4     |
| Sirachainan et al. 2017 [60] | *                                       | *                               | *                                     |                                                                          |                                                                 | *                     | *                                          |                       | 5     |
| Wu et al. 2016 [62]          | *                                       | *                               | *                                     |                                                                          |                                                                 | *                     | *                                          | *                     | 6     |
| Yang et al. 2013 [15]        | *                                       | *                               | *                                     |                                                                          |                                                                 | *                     | *                                          | *                     | 6     |
|                              | Cochrane Collaboration’s Risk Bias Tool |                                 |                                       |                                                                          |                                                                 |                       |                                            |                       |       |
|                              | Random sequence generation              | Allocation concealment          | Blinding of participant and personnel | Blinding of outcome assessment                                           | Incomplete outcome data                                         | Selective reporting   | Other bias                                 |                       |       |
| Sposto et al. 1989 [61]      | unclear                                 | unclear                         | high                                  | high                                                                     | low                                                             | low                   | low                                        |                       |       |

**eTable 3.** Sensitivity Analysis of Meta-analysis Results After Removing Subgroups of Studies With Potential Bias

| Comparison                     | RR overall                          | RR without SEER data                | RR without studies that have a quality grade < 6 | RR without data manually extracted from Kaplan-Meier |
|--------------------------------|-------------------------------------|-------------------------------------|--------------------------------------------------|------------------------------------------------------|
| 1-year RR mortality GTR vs STR | 0.69 [0.56-0.83]<br><i>p</i> <0.001 | 0.65 [0.51-0.83]<br><i>p</i> <0.001 | 0.66 [0.51-0.85]<br><i>p</i> =0.001              | 0.73 [0.59-0.91]<br><i>p</i> =0.006                  |
| 2-year RR mortality GTR vs STR | 0.74 [0.67-0.83]<br><i>p</i> <0.001 | 0.74 [0.64-0.87]<br><i>p</i> <0.001 | 0.69 [0.60-0.81]<br><i>p</i> <0.001              | 0.76 [0.67-0.87]<br><i>p</i> <0.001                  |
| 1-year RR mortality STR vs Bx  | 0.82 [0.66-1.01]<br><i>p</i> =0.07  | 0.80 [0.63-1.03]<br><i>p</i> =0.08  | 0.80 [0.60-1.06]<br><i>p</i> =0.12               | 0.94 [0.76-1.17]<br><i>p</i> =0.57                   |
| 2-year RR mortality STR vs Bx  | 0.89 [0.82-0.97]<br><i>p</i> =0.01  | 0.85 [0.78-0.94]<br><i>p</i> =0.001 | 0.86 [0.75-1.00]<br><i>p</i> =0.05               | 0.99 [0.89-1.10]<br><i>p</i> =0.80                   |

**eFigure 1. PRISMA Flow Diagram**

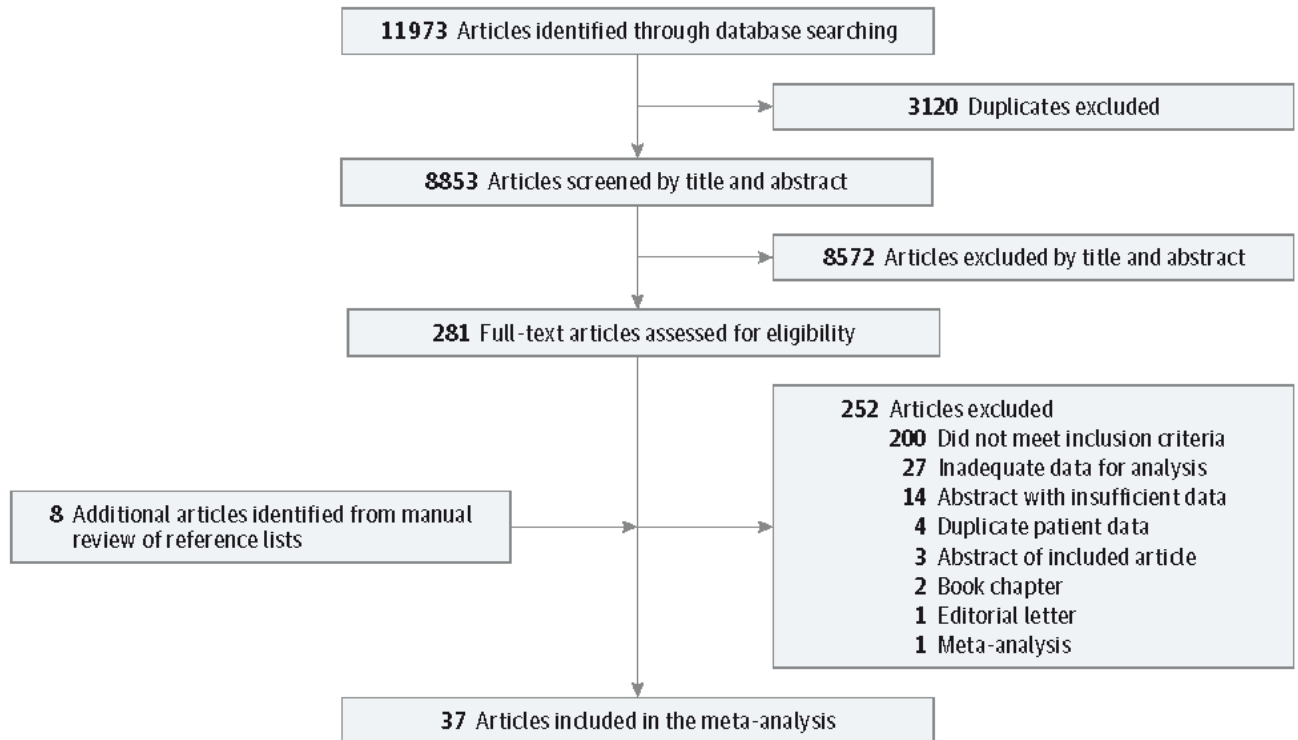

**eFigure 2.** Forest Plot of Relative Risk for 1-Year and 2-Year Mortality for Subtotal Resection Versus Biopsy

**A.) 1-Year Mortality**

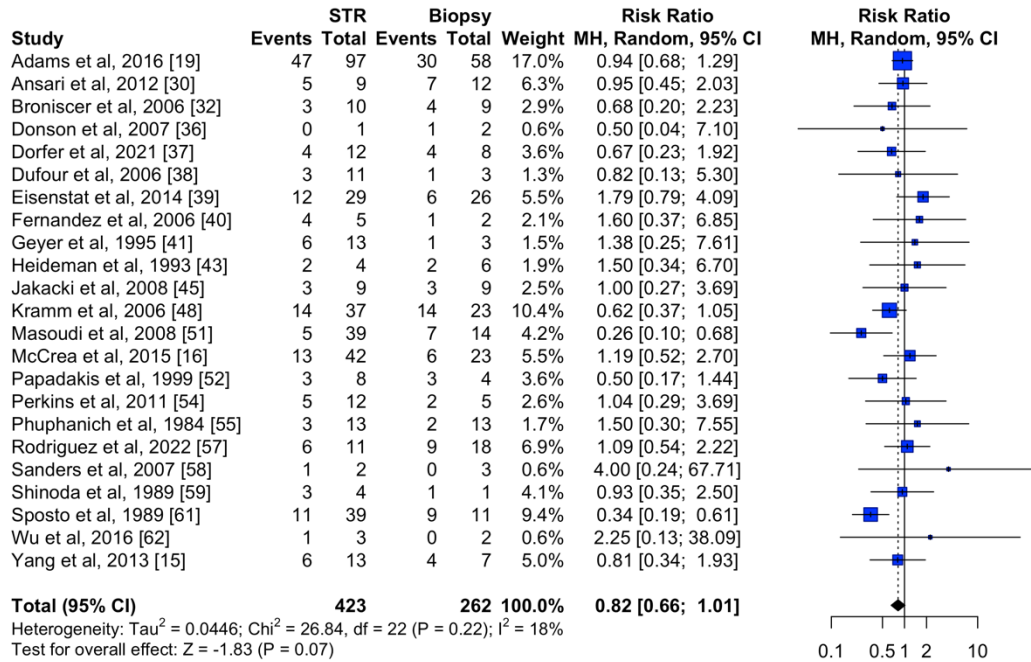

**B.) 2-Year Mortality**

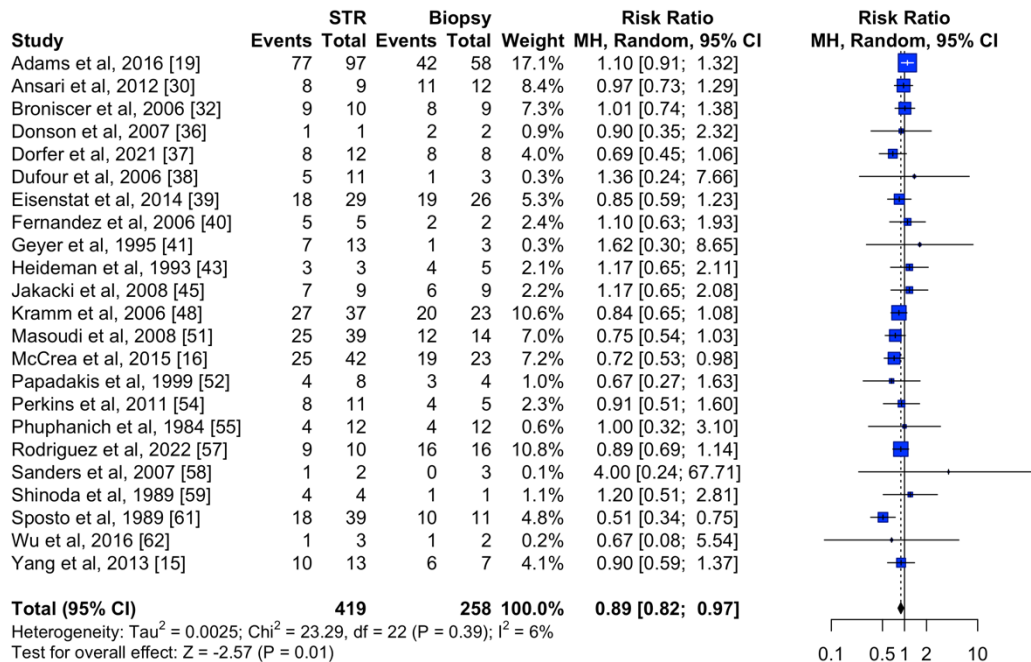

**eFigure 3.** Forest Plot of Relative Risk for 6-Month and 1-Year Progression for Gross Total Resection Versus Subtotal Resection

**A.) 6-Month Progression**

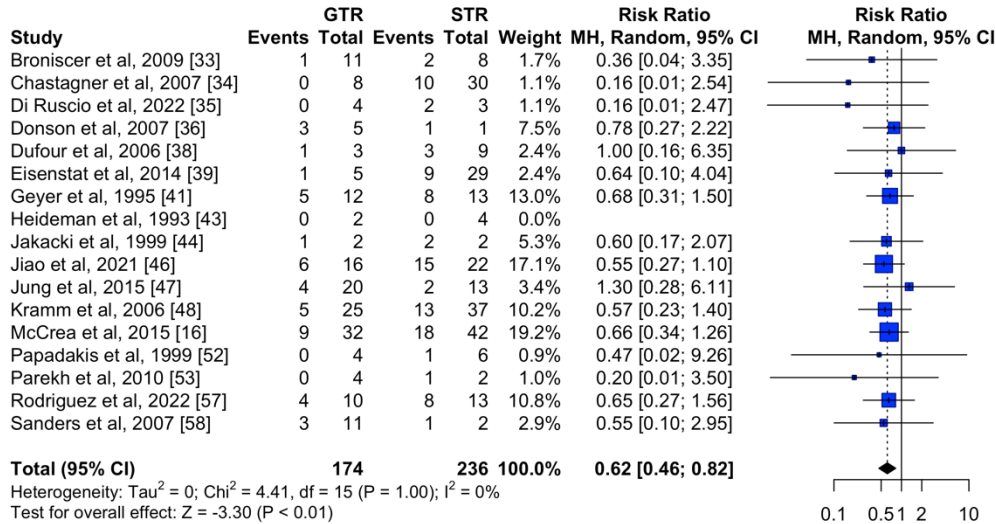

**B. 1-Year Progression**

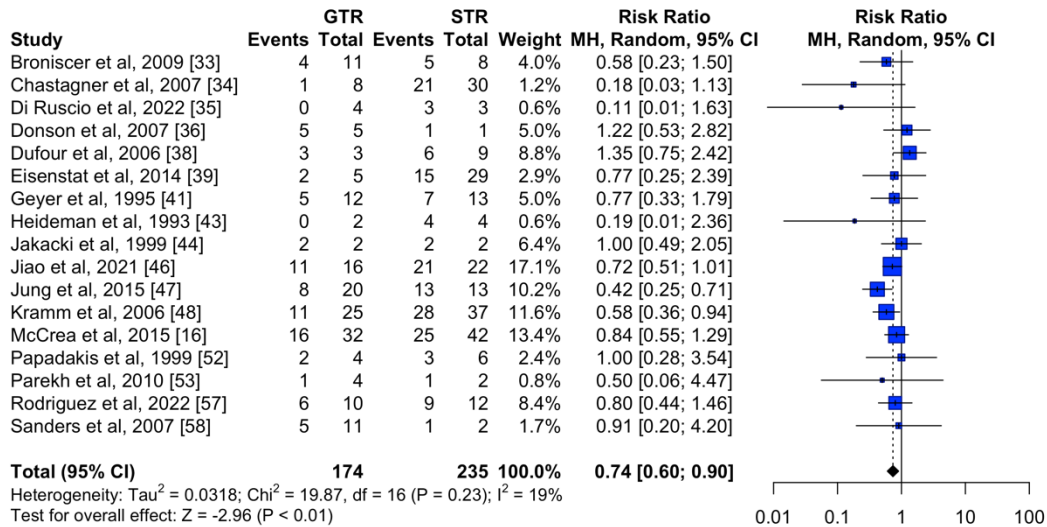

**eFigure 4.** Forest Plot of Relative Risk for 6-Month and 1-Year Progression for Subtotal Resection Versus Biopsy

**A.) 6-Month Progression**

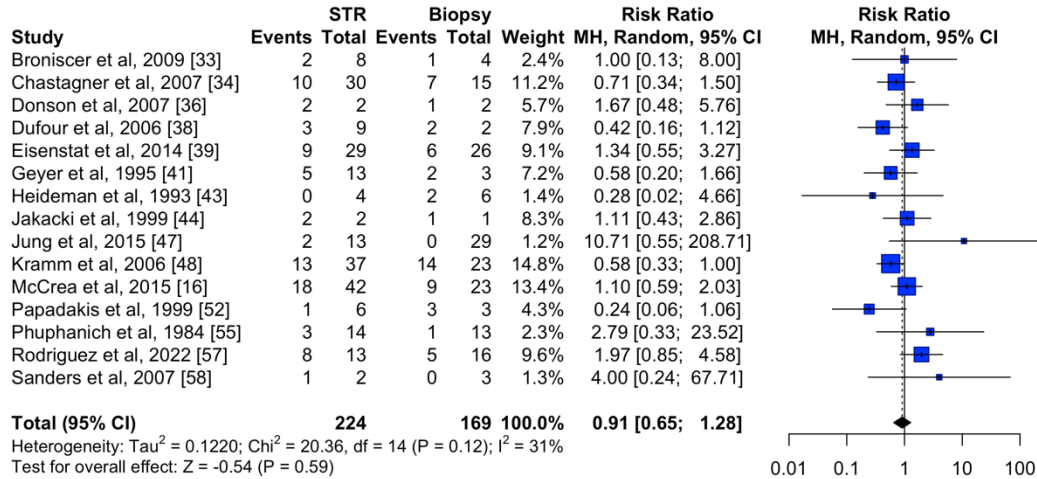

**B.) 1-Year Progression**

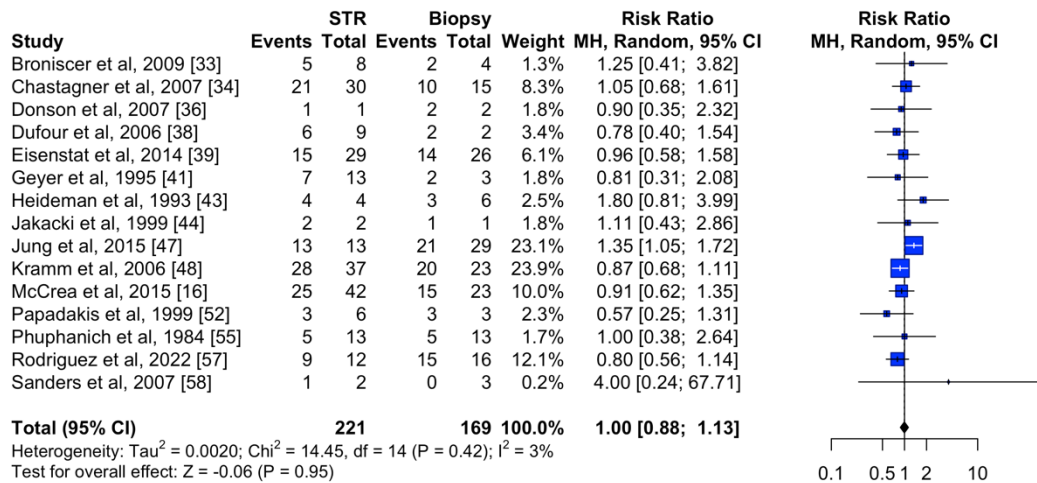

**eFigure 5.** Funnel Plots for Forest Plots of Relative Risk for 1-Year and 2-Year Mortality Between Gross Total Resection Versus Subtotal Resection and Subtotal Resection Versus Biopsy

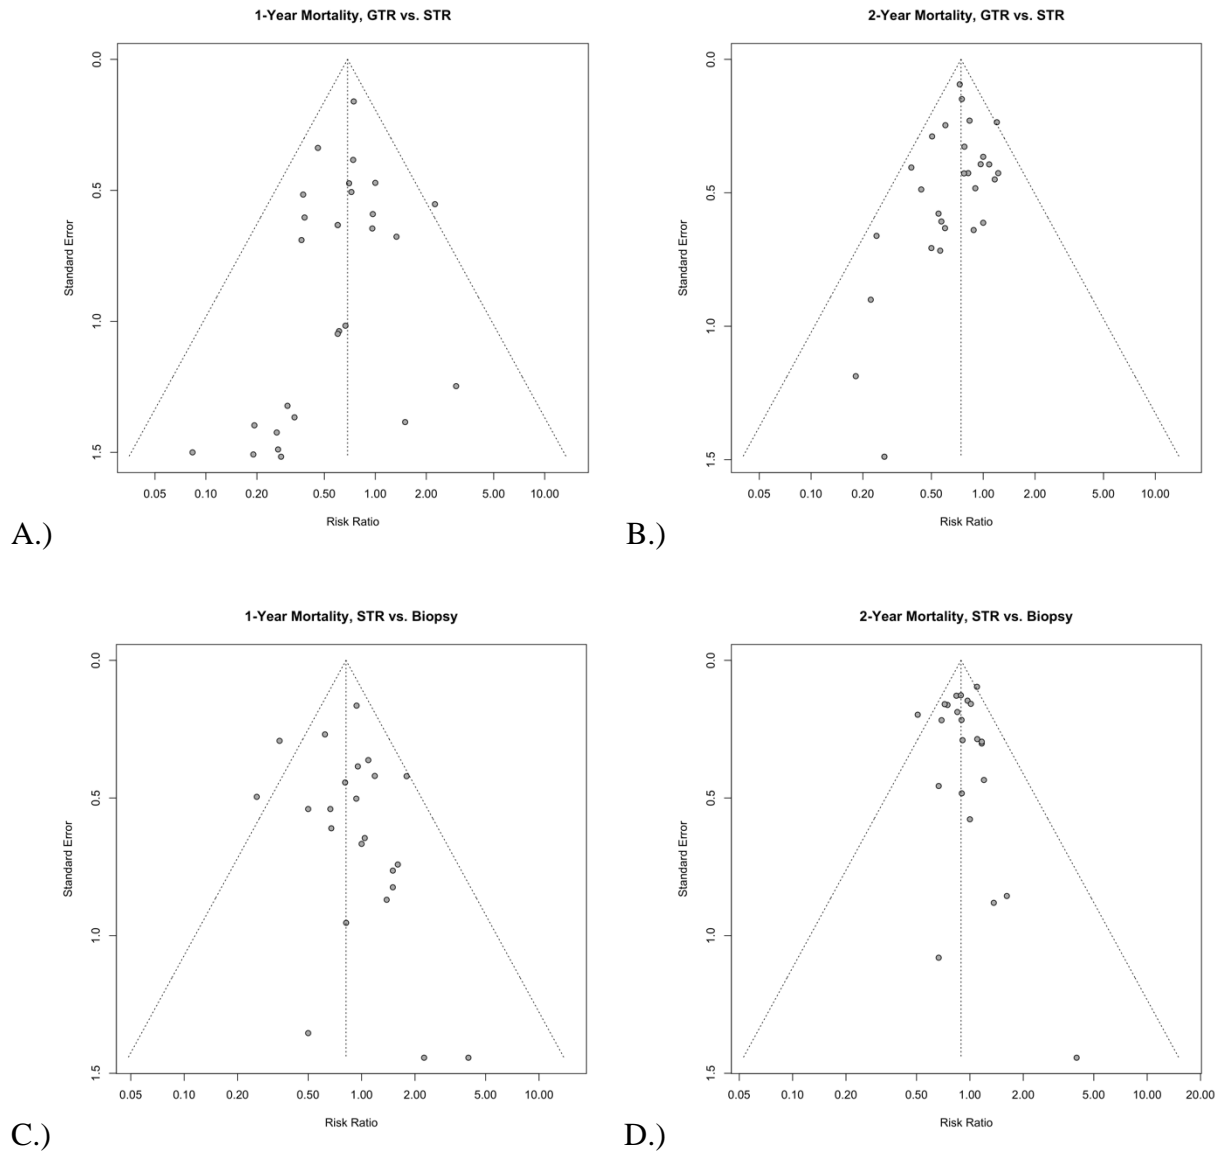

**eFigure 6.** Kaplan-Meier Curve Comparing Overall Survival According to Tumor Location and Adjuvant Treatment Regimen

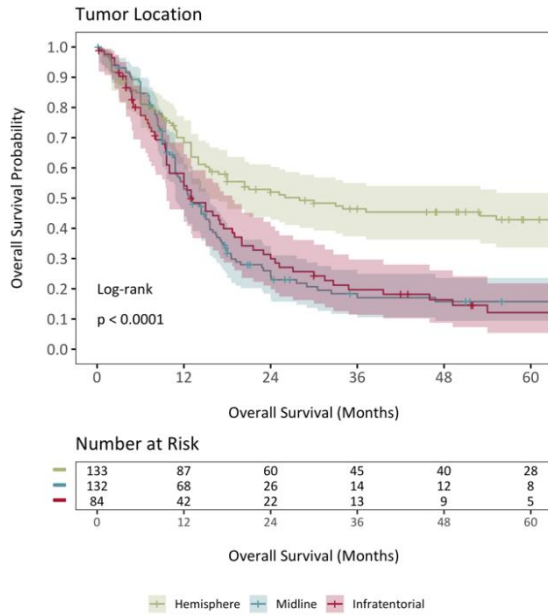

A.)

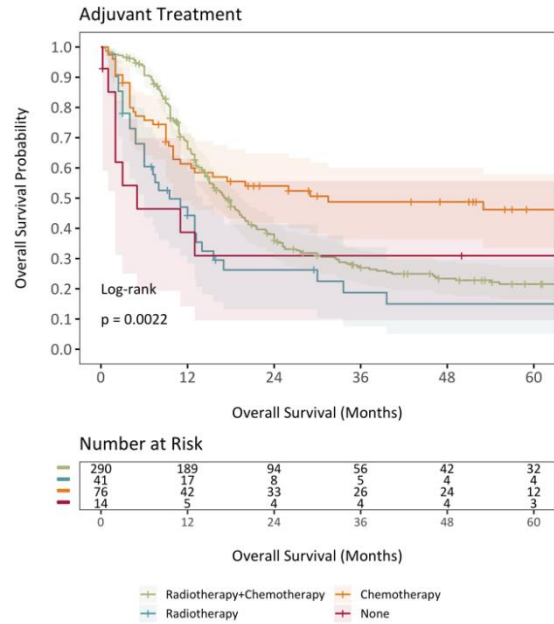

B.)



**eFigure 7. Kaplan-Meier Curve Comparing Overall Survival According to EOR in Tumor Location Subgroups**

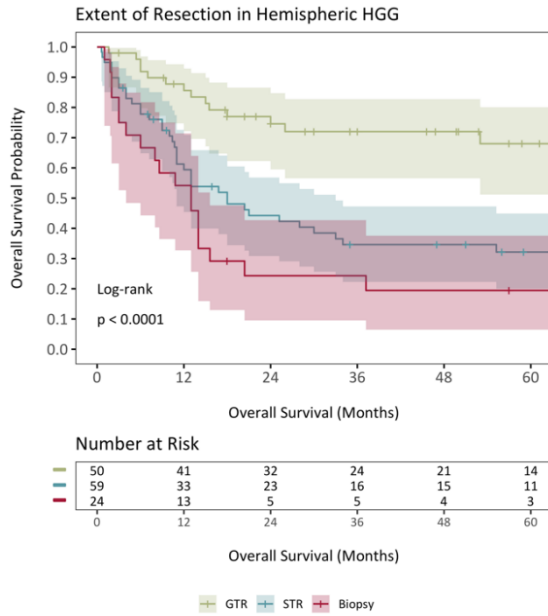

A.)

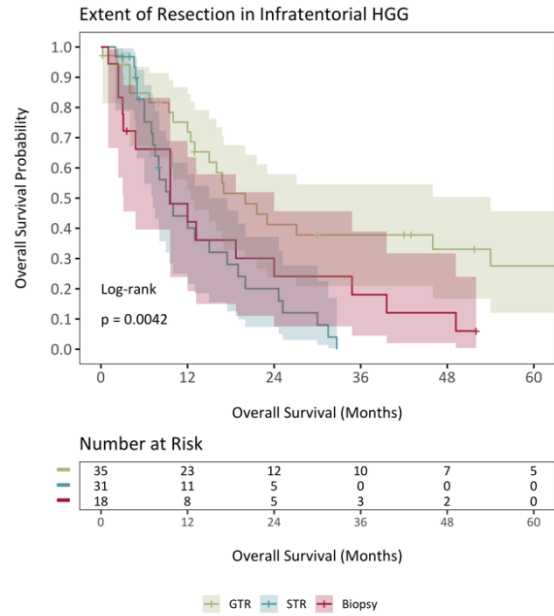

B.)

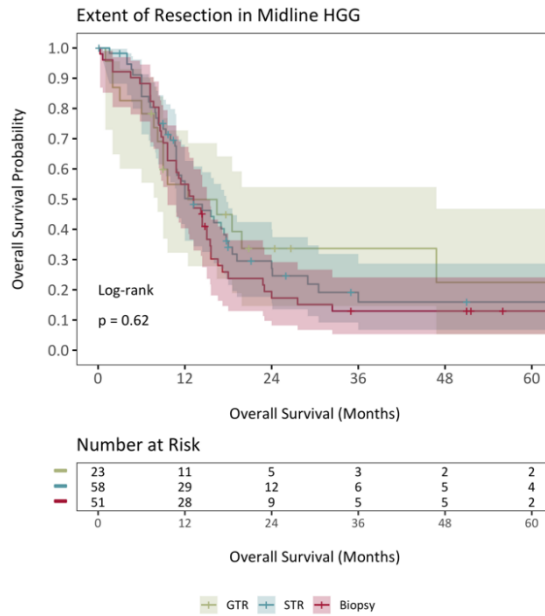

C.)
